# Supplementary material for: A Pharmacogenetic Study of CYP2C19 in Acute Coronary Syndrome Patients of Colombian Origin Reveals New Polymorphisms Potentially Related to Clopidogrel Therapy
Source: MDPI journal article supplement (doi:10.3390/jpm11050400), 2021-05-11
Supplement: s1 [file s1]

P33261 CP2CJ HUMAN  
A0A2I3RMB5 A0A2I3RMB5 PANTR  
G3QCV6 G3QCV6 GORGO  
G1RRD4 G1RRD4 NOMLE  
A0A2R9B7Q9 A0A2R9B7Q9 PANPA

10 11 12 13 14 15 16 17 18 19 20 21 22  
CLSCILLLSIWRQ  
CLSCILLLSIWRQ  
CLSCILLLSIWRQ  
CLSCILLLSLCRQ  
CLSCILLLSIWRQ  
\*\*\*\*\*

c.44T > A - p.L15H  
Prediction pathogenic score  
SIFT = 0; Damaging  
MutPred = 0.564 ; Pathogenic  
PolyPhen-2 = 0.999 ; Probably Damaging

P33261 CP2CJ HUMAN  
A0A2I3RMB5 A0A2I3RMB5 PANTR  
G3QCV6 G3QCV6 GORGO  
G1RRD4 G1RRD4 NOMLE  
A0A2R9B7Q9 A0A2R9B7Q9 PANPA

399 400 401 402 403 404 405 406 407 408 409  
KEFPNPEMFDP  
KEFPNPEMFDP  
KEFPNPEMFDP  
KEFPNPEMFDP  
KEFPNPEMFDP  
\*\*\*\*\*

c.1215G > C - p.E405D  
Prediction pathogenic score  
SIFT = 0.169 ; Tolerated  
MutPred = 0.425 ; Benign  
PolyPhen-2 = 0.001 ; Benign
